# Supplementary material for: European Survey of Prescriber Understanding of Risks Associated with Retigabine
Source: Springer Nature journal article supplement (doi:10.1007/s40801-015-0044-3), 2015-11-16
Supplement: MOESM1 [file 24440382]

## Questionnaire for Neurologists who Prescribe AEDs and were Sent the TROBALT Letter Containing the Physician's Guide (2012)

Note: **Bold** responses are correct and/or accepted responses.

### Screening Questions:

1. Do you agree to take part in this survey?
  - **Yes**
  - No (Exclude)
  
2. When was the last time you prescribed an anti-epileptic drug for a patient?
  - Less than a month ago
  - Between 1 and 2 months ago
  - Between 2 and 3 months ago
  - More than 3 months ago (Exclude)
  
3. Have you ever prescribed TROBALT?
  - Yes
  - No
  - I don't know
  
4. In which country is your primary medical practice?
  - Germany
  - Denmark
  - United Kingdom
  - Switzerland
  - Sweden
  - Spain
  - Slovakia
  - Norway
  - Other (exclude)
  
5. Are you an employee of GlaxoSmithKline or United BioSource Corporation?
  - Yes (Exclude)
  - **No**

### Questionnaire for Neurologists who Prescribe AEDs and Were Sent the TROBALT Letter Containing the Physician's Guide

#### [CORRECT ANSWERS ARE INDICATED IN BOLD]

6. For which of the following conditions is TROBALT approved for use?
  - Migraine

- **Partial-onset seizures**
  - All types of seizures
  - All of the above
  - None of the above
  - I don't know
7. Is TROBALT indicated for use as monotherapy?
- Yes
  - **No**
  - I don't know
8. What is the maximum recommended daily maintenance dose of TROBALT for most patients? (Please select the best response.)
- 600 mg
  - 900 mg
  - **1200 mg**
  - 2000 mg
  - None of the above
  - I don't know
9. Which one of the following statements is true? (Please select the best response.)
- TROBALT should be taken once a day.
  - TROBALT should be taken twice a day.
  - **TROBALT should be taken three times a day.**
  - TROBALT should be taken four times a day.
  - None of the above
  - I don't know
10. When increasing the dose, what is the maximum total daily dose at which TROBALT can be increased once every 7 days? (Please select the best response.)
- 50 mg
  - **150 mg**
  - 300 mg
  - 600 mg
  - None of the above
11. Which one of the following statements is true? (Please select the best response.)
- There are no lower age limits for TROBALT usage.
  - The youngest age at which TROBALT can be used is 12.
  - **The youngest age at which TROBALT can be used is 18.**
  - I don't know

Please respond “true,” “false” or “I don’t know” to each of the following questions:

12. The quickest time by which the minimum maintenance dose of 600mg should be reached is the third week?
- **True**
  - False
  - I don’t know
13. For the general population, the recommended total initial dosage should be 150mg per day for one week.
- True
  - **False**
  - I don’t know
14. People taking TROBALT had a higher chance of experiencing which of the following risks in clinical studies? (Please select all that apply)
- **Urinary retention**
  - **Confusional state**
  - **Hallucinations**
  - **Psychotic disorders**
  - Myocardial infarction
  - Renal carcinoma
  - All of the above
  - None of the above
  - I don’t know
15. It is known from controlled studies that adverse events related to voiding dysfunction generally tend to be reported how soon after starting TROBALT?
- Within the first week
  - **Within the first 8 weeks**
  - After 4 months
  - After 12 months
  - I don’t know
16. It is known from controlled studies that confusional state, hallucinations, and/or psychotic disorders generally tend to be reported how soon after starting TROBALT?
- 4 weeks
  - **8 weeks**
  - 12 weeks
  - 16 weeks
  - I don’t know

17. Which of the following urinary symptoms, if any, should you specifically advise patients taking TROBALT to watch out for? (Please select the best response.)

- Pain when urinating
- Difficulty starting urination
- Slow stream
- Inability to pass urine
- **All of the above**
- None of the above
- I don't know

18. According to the TROBALT Physician's Guide, appropriate dose titration may minimize the risk of which of the following adverse events? (Please select the best response.)

- QT prolongation
- **CNS side effects such as hallucinations**
- Urinary retention
- All of the above
- None of the above
- I don't know

[DO NOT DISPLAY QUESTIONS 19 and 20 FOR RESPONDENTS FROM SWITZERLAND]

19. Using the Treatment Initiation Pack, by which week can the patient reach a dose of 600mg/day?

- 2 weeks
- **3 weeks**
- 4 weeks
- 5 weeks
- None of the above

20. At what dose has TROBALT been shown to produce a possible QT prolonging effect?

- 600 mg
- 900 mg
- **1200mg**
- 1800 mg
- I don't know

21. For which patients is it recommended that an ECG is recorded before initiating TROBALT? (Please select all that apply.)

- Patients with hypertension
- **Patients with congestive heart failure**
- **Patients with ventricular hypertrophy**
- **Patients with hypokalemia**
- All of the above

- None of the above
- I don't know

22. What should you do in a patient with a QTc of less than 440ms before starting TROBALT? (Please select the best response)

- Recheck the ECG 1 week after the first dose
- Recheck the ECG at monthly intervals
- **Recheck the ECG after reaching the maintenance dose**
- I don't know

23. Which new cardiac effects in particular should you warn your patients about after prescribing TROBALT? (Please select all that apply)

- Syncope
- Palpitations
- Any other symptoms of arrhythmia
- **All of above**
- None of the above

24. How would you classify your primary medical specialty?

- Neurology
- Neurosurgery
- Epileptology
- Other (specify) \_\_\_\_\_ [FREE TEXT]
- 

25. Have you read the TROBALT information letter that was sent at the launch of TROBALT?

- Yes
- No
- I don't know

26. From which of the following sources have you learned about the risks associated with use of TROBALT? (Please select all that apply)

- TROBALT launch letter
- GlaxoSmithKline medical information
- Other health care professionals
- GlaxoSmithKline promotional materials
- GlaxoSmithKline sales representatives
- Journal article
- GlaxoSmithKline-sponsored educational meeting
- None of the above

27. What is your gender?

- Male
- Female

28. For how many years have you been in medical practice?

- Less than 3 years
- 3-5 years
- 6-10 years
- 11-15 years
- 16-20 years
- More than 20 years
- Prefer not to answer

29. Do you agree to provide your name and address so that we can issue a payment for your time in completing this survey?

- Yes (Record name and address)
- No

Name \_\_\_\_\_

Address \_\_\_\_\_

[CLOSING] That ends the survey. Thank you again for your help. The correct answers to the questions about TROBALT follow.
